# Supplementary material for: Metal ions directing the geometry and nuclearity of azido-metal(ii) complexes derived from bis(2-(3,5-dimethyl-1H-pyrazol-1-yl)ethyl)amine
Source: Royal Society of Chemistry journal article supplement (doi:10.1039/c2dt32540c), 2012-12-21
Supplement: c2dt32540c.pdf [file c2dt32540c.pdf]

## ELECTRONIC SUPPLEMENTARY MATERIAL

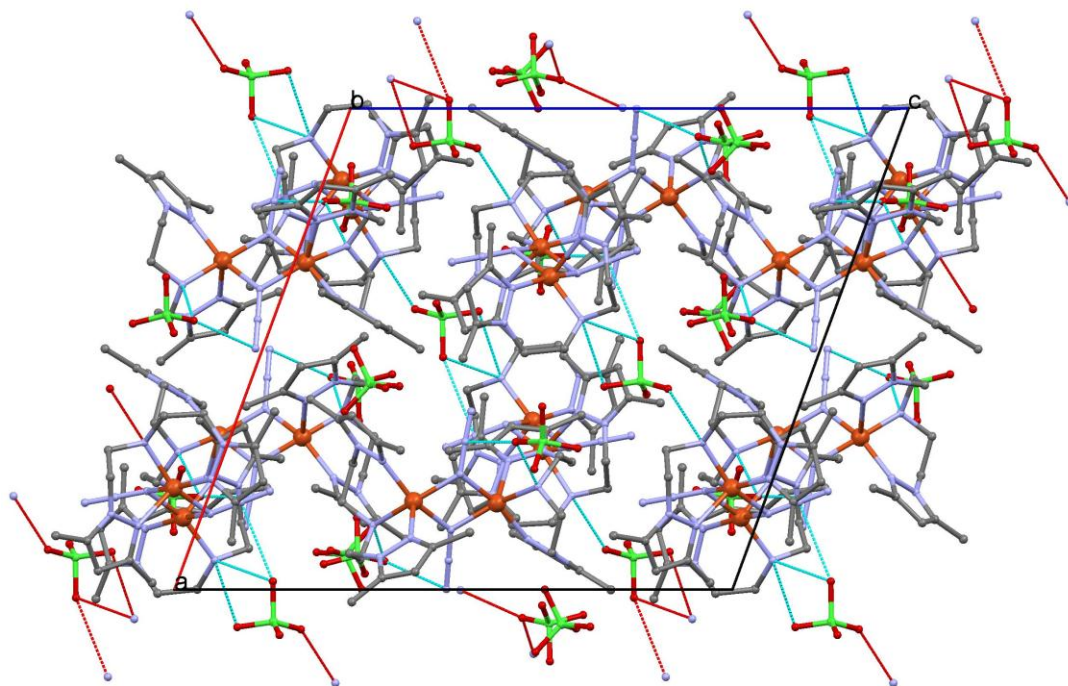

**Figure S1:** Packing plot of [Cu(bedmpza)(μ1,1-N<sub>3</sub>)]<sub>2</sub>(ClO<sub>4</sub>)<sub>2</sub> (1)

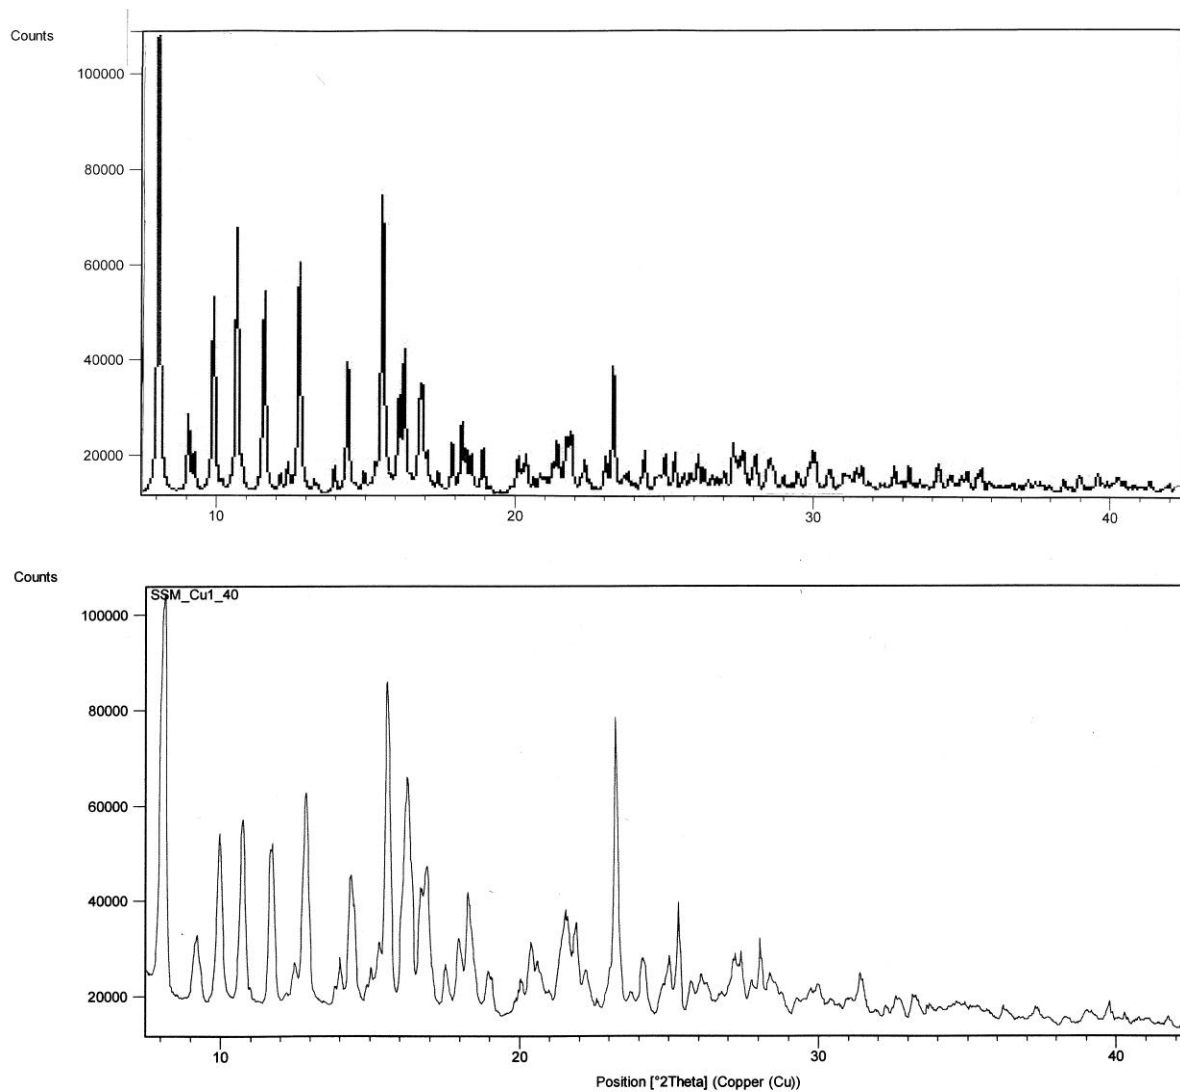

**Figure S2. Top:** XRD pattern of compound **1**: calculated from single crystal data at 100 K.  
**bottom:** experimental XRD pattern at RT of the same amount of powder sample of compound **1** as used for the magnetic measurements [Bruker D8 Advance diffractometer, profile fit: Cu-K $\alpha$ -radiation, range 7.500 – 60.000° (2  $\Theta$ ), step size: 0.020° (2  $\Theta$ ), 13 variables,  $R_{(\text{Bragg})} = 4.08\%$ ,  $R_{(\text{profile})} = 4.68\%$ ].

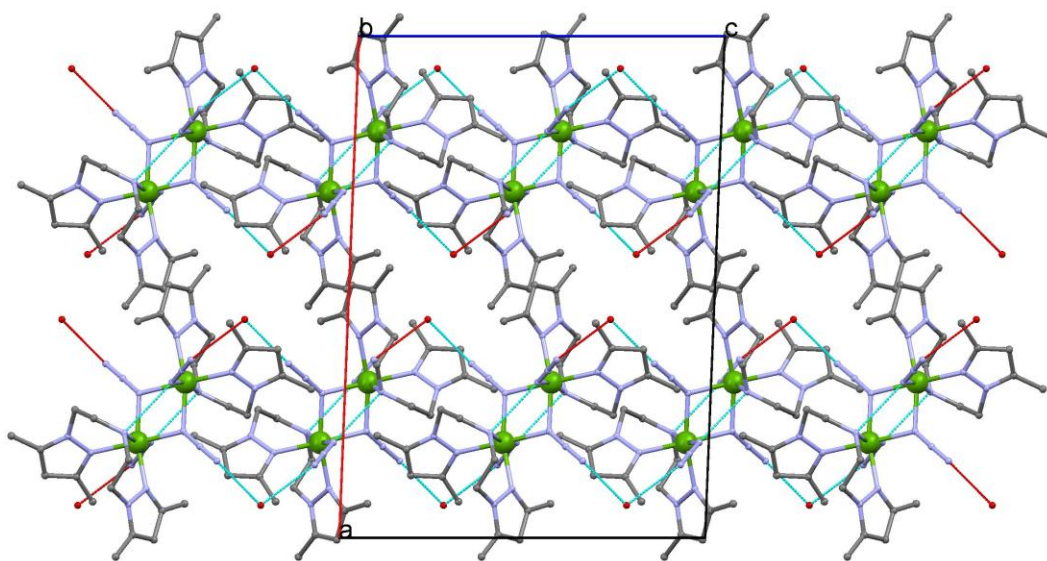

**Figure S3:** Packing plot of  $[\text{Ni}(\text{bedmpza})(\mu 1,1\text{-N}_3)(\text{N}_3)]_2 \cdot 1.5\text{H}_2\text{O}$  (**2**).

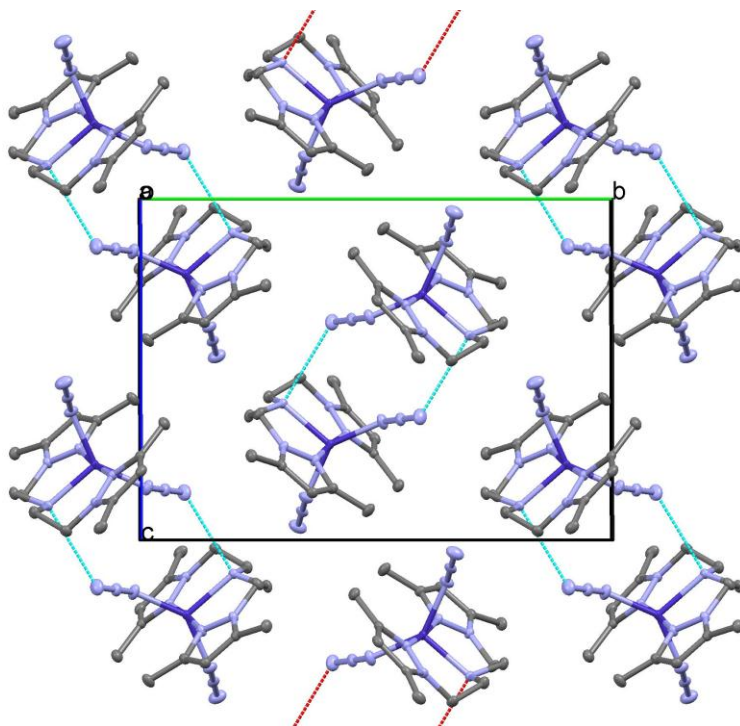

**Figure S4:** Packing plot of  $[\text{Co}(\text{bedmpza})(\text{N}_3)_2]$  (**3**).

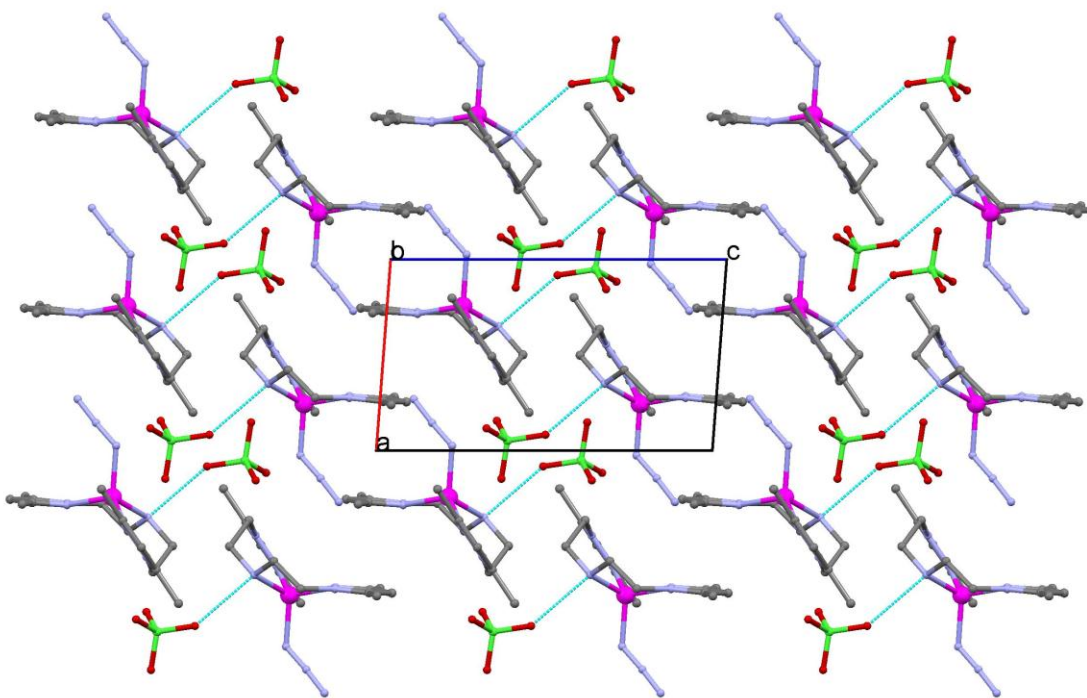

**Figure S5.** Packing plot of [Zn(bedmpza)(N<sub>3</sub>)]ClO<sub>4</sub> (**4**).

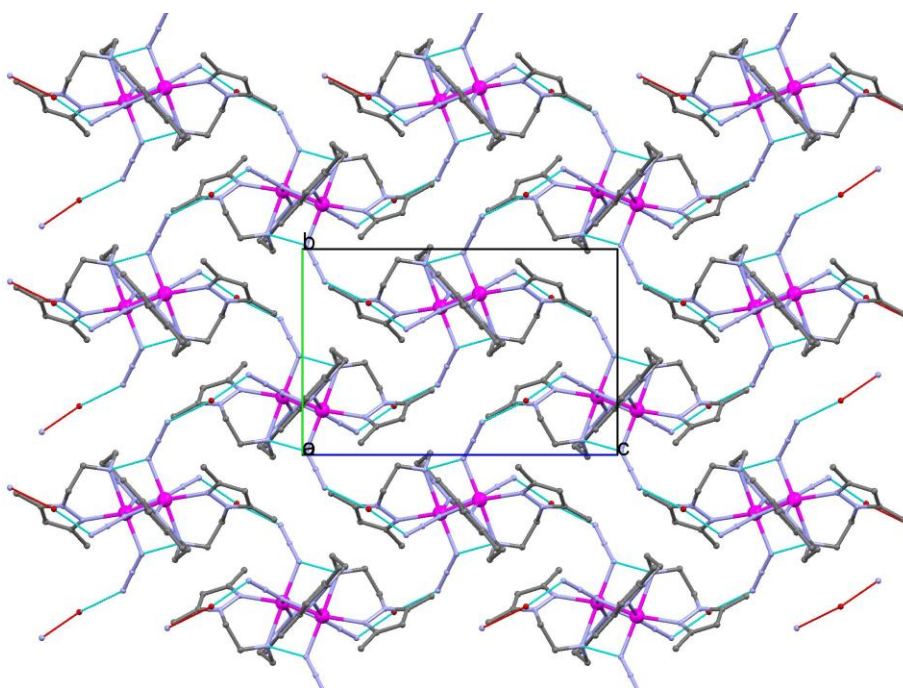

**Figure S6.** Packing plot of [Cd(bedmpza)(μ<sub>1,1</sub>-N<sub>3</sub>)(N<sub>3</sub>)]<sub>2</sub>·1.5H<sub>2</sub>O (**5**).

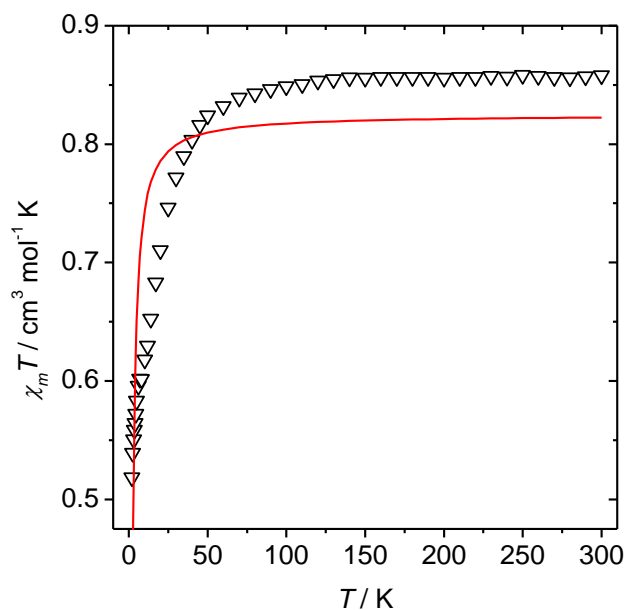

**Figure S7.** Plot of the  $\chi_m T$  vs  $T$  for complex **1**. Solid line (red color) represents the best fit using the simplest Bleaney-Bowers formula (only one moiety):  $J = -2.52 \text{ cm}^{-1}$ ;  $g = 2.10$ .

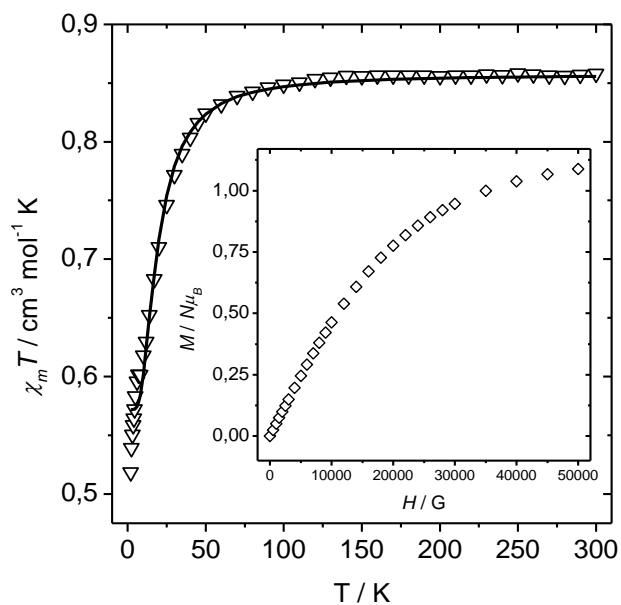

**Figure S8.** Plot of the  $\chi_m T$  vs  $T$  for complex **1**. Solid line represents the best fit (see Text). Inset: Plot of the reduced magnetization at 2 K for complex **1**.

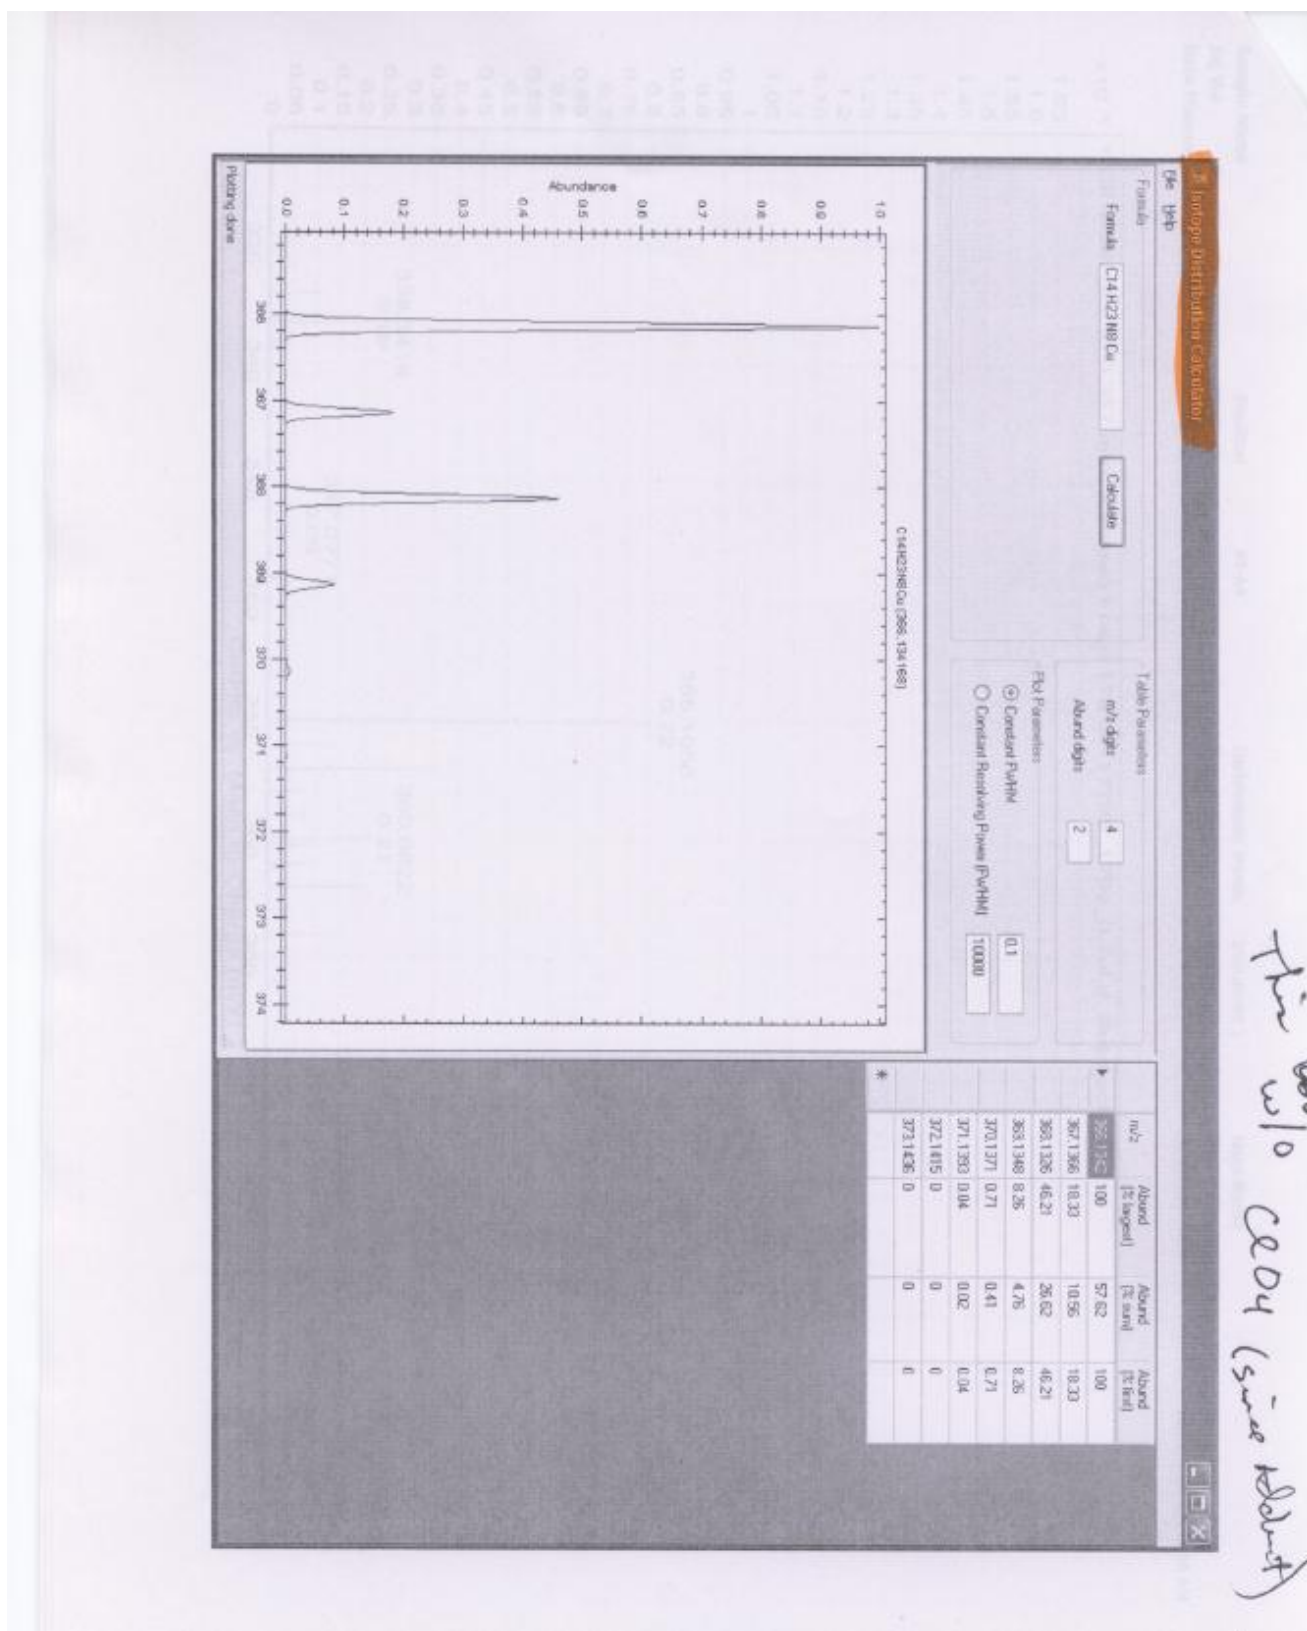

**Figure S9.** ESI-MS of complex  $[\text{Cu}(\text{bedmpza})(\mu_{1,1}\text{-N}_3)]_2(\text{ClO}_4)_2$  (**1**) in MeOH.
